# Supplementary material for: Exogenous miRNAs induce post-transcriptional gene silencing in plants
Source: PubMed Central journal article supplement (PMC8516643; doi:10.1038/s41477-021-01005-w), 2021-10-14
Supplement: 41477_2021_1005_MOESM1_ESM.pdf [file 41477_2021_1005_MOESM1_ESM.pdf]

---

**Supplementary information**

---

**Exogenous miRNAs induce post-transcriptional gene silencing in plants**

---

In the format provided by the authors and unedited

## Supplementary Information

### Exogenous miRNAs induce post-transcriptional gene silencing in plants

Federico Betti<sup>1\*</sup>, Maria Jose Ladera-Carmona<sup>1\*</sup>, Daan A. Weits<sup>1</sup>, Gianmarco Ferri<sup>2</sup>, Sergio Iacopino<sup>3</sup>, Giacomo Novi<sup>1</sup>, Benedetta Svezia<sup>1</sup>, Alicja Barbara Kunkowska<sup>1</sup>, Antonietta Santaniello<sup>4</sup>, Alberto Piaggese<sup>4</sup>, Elena Loreti<sup>5\*\*</sup>, Pierdomenico Perata<sup>1\*\*</sup>

<sup>1</sup>PlantLab, Institute of Life Sciences, Sant'Anna School of Advanced Studies, Pisa, Italy; <sup>2</sup> NEST, Scuola Normale Superiore, Pisa, Italy; <sup>3</sup>Department of Biology, University of Pisa, Pisa, Italy, <sup>4</sup>Valagro spa, Atessa (CH), Italy; <sup>5</sup>Institute of Agricultural Biology and Biotechnology, National Research Council, Pisa, Italy

**Table S1. *amiFluc* complete sequence and oligonucleotide sequences (5' → 3') of artificial miRNAs.**

---

*amiFluc* complete sequence

(underlined: Fluc targeting sequence; bold: edited complementary strand in the hairpin)

---

*amiFluc* CAAACACACGCTCGGACGCATATTACACATGTTTCATACACTTAATACTCGCTGTTTTGAATTGATGTTTTA  
 GGAATATATATGTAGACGAGAAAACGCTGCGCGTTATCACAGGTCGTGATATGATTCAATTAGCTTCCG  
 ACTCATTCACAAATACCGAGTCGCCAAAATCAAACCTAGACTCGTTAAATGAATGAATGATGCGGATG  
 ACAAATTGGATCATTGATTCTCTTTGA**TTAACGCCAGCGTTTTCCCG**TCTCTCTTTGTATTCCAATTTCT  
 TGATTAATCTTTCCTGCACAAAACATGCTTGATCCACTAAGTGACATATATGCTGCCTTCGTATATATAG  
 TTCTGGTAAAATTAACATTTTGGGTTTATCTTTATTTAAGGCATCGCCATG

---

| miRNA          | Mature strand         | Complementary strand   |
|----------------|-----------------------|------------------------|
| <i>miR399d</i> | UGCCAAAGGAGAUUUGCCCCG | UACUGGGCGAAUACUCCUAUGG |
| <i>miR156a</i> | UGACAGAAGAGAGUGAGCAC  | GCUCACUGCUCUUUCUGUCAGA |
| <i>miR319b</i> | UUGGACUGAAGGGAGCUCCU  | AGAGCUUUCUUCGGUCCACUC  |

---

**Table S2. List of oligonucleotides used for cloning.**

| <b>Name</b>                      | <b>Sequence (5'→3')</b>    |
|----------------------------------|----------------------------|
| pUBQ10-Fw                        | CACCGTCATTATCCTATGCAAATC   |
| pUBQ10-5'UTR <sub>PHO2</sub> -Fw | CACACACGAGGTGGGATACT       |
| pUBQ10-5'UTR <sub>PHO2</sub> -Rv | AGTATCCACCTCGTGTGTG        |
| 5'UTR <sub>PHO2</sub> -Rv        | AGTTTAGACGCCTGCCATGGA ACTG |
| SPL9-Fw                          | CACCATGGAGATGGGTTCCAAC     |
| SPL9-Rv                          | GAGACCAGTTGGTATGGTGAGAAG   |
| pPHO2-Fw                         | CACCAACCAGAACTAGATCGCGTCA  |
| pPHO2-Rv                         | AGTTTAGACGCCTGCCATGGA ACTG |

**Table S3. Stem-Loop primers used for miRNA expression analysis using RT-qPCR.**

| <b>miRNA</b>   | <b>Stem-Loop primer</b>                                   | <b>Forward primer (5'→3')</b> | <b>Universal Reverse primer (5'→3')</b> |
|----------------|-----------------------------------------------------------|-------------------------------|-----------------------------------------|
| <i>miR156a</i> | GTCGTATCCAGTGCAGGGTCCGAGGTATTC<br>GCACTGGATACGACGTGCTC    | GCGGCGGTGACAGAAGAGAGT         | GTGCAGGGTCCGAGGT                        |
| <i>miR399d</i> | GTCGTATCCAGTGCAGGGTCCGAGGTATTC<br>GCACTGGATACGACCGGGGCAAA | CGACGTGCCAAAGGAGATTTG         |                                         |
| <i>miR399*</i> | GTTGGCTCTGGTGCAGGGTCCGAGGTA<br>TTCGCAC CAGAGCCAACCCATAG   | GTGTACTGGGCGAATACTC           |                                         |
| <i>amiFluc</i> | GTCGTATCCAGTGCAGGGTCCGAGGTATTC<br>GCACTGGATACGACCGGGAA    | GCGGCGGTTAACGCCAGCGT          |                                         |

**Table S4. List of primer sequences used for qPCR analysis.**

| <b>Name</b>                     | <b>Forward primer (5'→3')</b> | <b>Reverse primer (5'→3')</b> |
|---------------------------------|-------------------------------|-------------------------------|
| <i>At4g05320 (UBQ10)</i>        | GGCCTTGATAATCCCTGATGAATAAG    | AAAGAGATAACAGGAACGGAAACATAGT  |
| <i>At2g33770 (PHO2)</i>         | AGCTGACCGTTGCTGTCAGTC         | CGGTGTAGCTTCCTGTTTGT          |
| <i>At2g33810 (SPL3)</i>         | CTTAGCTGGACACAACGAGAGAAGGC    | GAGAAACAGACAGAGACACAGAGGA     |
| <i>At2g42200 (SPL9)</i>         | TGTGGCTGGTATCGAACAGAGG        | TTCCGGAAGCTGATGAAACCTG        |
| <i>At1G27370(SPL10)</i>         | GTGGGAGAATGCTCAGGAGGC         | GAGTGTGTTTGATCCCTTGTAATCC     |
| <i>5'UTR<sub>PHO2</sub>Fluc</i> | TTCCATGGCAGGCGTCTAAA          | AGGAACCAGGGCGTATCTCT          |

**Table S5. Oligonucleotide sequences used for 5' RACE-PCR.**

| <b>Name</b>              | <b>Forward primer (5'→3')</b>                |
|--------------------------|----------------------------------------------|
| 5' RACE Adapter          | CUGAUGGCGAUGAAUGAACACUGCGUUUGCUGGCUUUGAUGAAA |
| 5'RACE Outer primer      | GCTGATGGCGATGAATGAACACTG                     |
| 5'RACE Inner primer      | CGCGGATCCGAACACTGCGTTTGCTGGCTTTGATG          |
| UBQ10 F                  | GGCCTTGTATAATCCCTGATGAATAAG                  |
| UBQ10 F                  | AAAGAGATAACAGGAACGGAAACATAGT                 |
| 5'UTR <sub>PHO2</sub> F1 | CTGTTTCCCATTTATACTTCAGATTC                   |
| FLUC R1                  | CGTTCATTATAAATGTCGTTTCGC                     |
| FLUC R2                  | AGGAACCAGGGCGTATCTCT                         |
