# Supplementary material for: Exogenous miRNAs induce post-transcriptional gene silencing in plants
Source: PubMed Central journal article supplement (PMC8516643; doi:10.1038/s41477-021-01005-w), 2021-10-14

Source data for Extended data Figure 4a

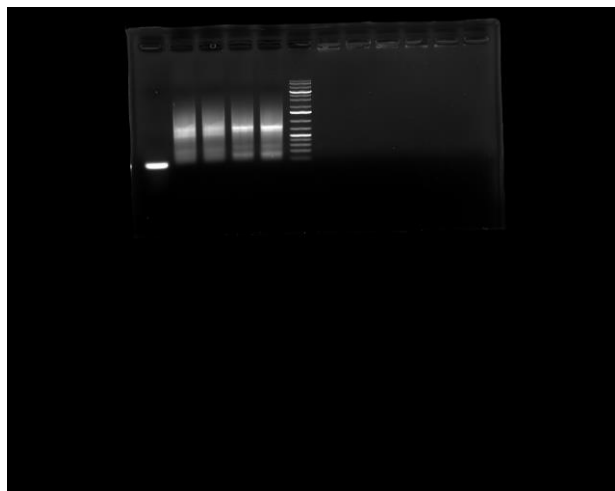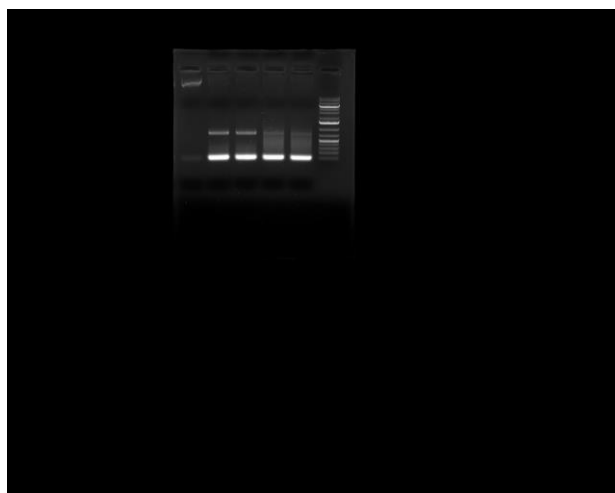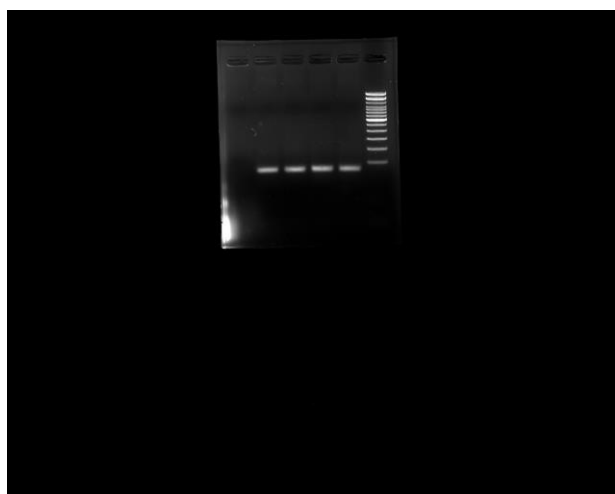

Supplement: 41477_2021_1005_MOESM13_ESM.pdf [file 41477_2021_1005_MOESM13_ESM.pdf]
